# Supplementary material for: Ru cyclooctatetraene precursors for MOCVD
Source: Royal Society of Chemistry journal article supplement (doi:10.1039/c1dt11454a), 2011-10-12
Supplement: c1dt11454a.pdf [file c1dt11454a.pdf]

Electronic Supplementary Information (ESI) for

**Ru cyclooctatetraene precursors for MOCVD**

Tatsuya Ando, Naoki Nakata, Kazuharu Suzuki, Takahiro Matsumoto and Seiji Ogo\*

\*To whom correspondence should be addressed. E-mail: [ogotcm@mail.cstm.kyushu-u.ac.jp](mailto:ogotcm@mail.cstm.kyushu-u.ac.jp)

## A Table of Contents

|                                                                                        |          |
|----------------------------------------------------------------------------------------|----------|
| <b>Table S1</b> , A table of contents                                                  | page S1  |
| <b>Fig. S1</b> , IR spectrum of <b>2</b> .                                             | page S2  |
| <b>Fig. S2</b> , IR spectrum of <b>3</b> .                                             | page S3  |
| <b>Fig. S3</b> , <sup>1</sup> H NMR spectrum of <b>2</b> .                             | page S4  |
| <b>Fig. S4</b> , <sup>1</sup> H NMR spectrum of <b>3</b> .                             | page S5  |
| <b>Fig. S5</b> , TG-DTA analysis of <b>1</b> .                                         | page S6  |
| <b>Fig. S6</b> , TG-DTA analysis of <b>2</b> .                                         | page S7  |
| <b>Fig. S7</b> , TG-DTA analysis of <b>3</b> .                                         | page S8  |
| <b>Fig. S8</b> , A SEM image of a Ru film deposited from <b>1</b> .                    | page S9  |
| <b>Fig. S9</b> , A SEM image of a Ru film deposited from <b>3</b> .                    | page S10 |
| <b>Fig. S10</b> , An AFM image of a Ru film deposited from <b>1</b> .                  | page S11 |
| <b>Fig. S11</b> , An AFM image of a Ru film deposited from <b>3</b> .                  | page S12 |
| <b>Fig. S12</b> , An XRD pattern of a Ru film deposited from <b>2</b> .                | page S13 |
| <b>Fig. S13</b> , An XPS spectrum of a Ru film deposited from <b>1</b> .               | page S14 |
| <b>Fig. S14</b> , An XPS spectrum of a Ru film deposited from <b>3</b> .               | page S15 |
| <b>Fig. S15</b> , A SEM image of hole with aspect ratio 40:1 deposited from <b>1</b> . | page S16 |
| <b>Fig. S16</b> , A SEM image of hole with aspect ratio 40:1 deposited from <b>3</b> . | page S17 |

**Table S1.** A table of contents

|                           | [Ru <sup>0</sup> (η <sup>4</sup> -COT-H)-<br>(CO) <sub>3</sub> ] ( <b>1</b> ) | [Ru <sup>0</sup> (η <sup>4</sup> -COT-Me)-<br>(CO) <sub>3</sub> ] ( <b>2</b> ) | [Ru <sup>0</sup> (η <sup>4</sup> -COT-Et)-<br>(CO) <sub>3</sub> ] ( <b>3</b> ) |
|---------------------------|-------------------------------------------------------------------------------|--------------------------------------------------------------------------------|--------------------------------------------------------------------------------|
| FTIR                      | previously reported                                                           | Fig. S1                                                                        | Fig. S2                                                                        |
| <sup>1</sup> H NMR        | previously reported                                                           | Fig. S3                                                                        | Fig. S4                                                                        |
| X-ray                     | previously reported                                                           | Fig. 4                                                                         | –                                                                              |
| TG-DTA                    | Fig. S5                                                                       | Fig. S6                                                                        | Fig. S7                                                                        |
| melting point             | Table 1                                                                       | Table 1                                                                        | Table 1                                                                        |
| decomposition temperature | Table 1                                                                       | Table 1                                                                        | Table 1                                                                        |
| vapour pressure           | Table 1                                                                       | Table 1                                                                        | Table 1                                                                        |
| SEM                       | Fig. S8                                                                       | Fig. 6                                                                         | Fig. S9                                                                        |
| AFM                       | Fig. S10                                                                      | Fig. 7                                                                         | Fig. S11                                                                       |
| XRD                       | –                                                                             | Fig. S12                                                                       | –                                                                              |
| XPS                       | Fig. S13                                                                      | Fig. 8                                                                         | Fig. S14                                                                       |
| SEM                       | Fig. S15                                                                      | Fig. 9                                                                         | Fig. S16                                                                       |

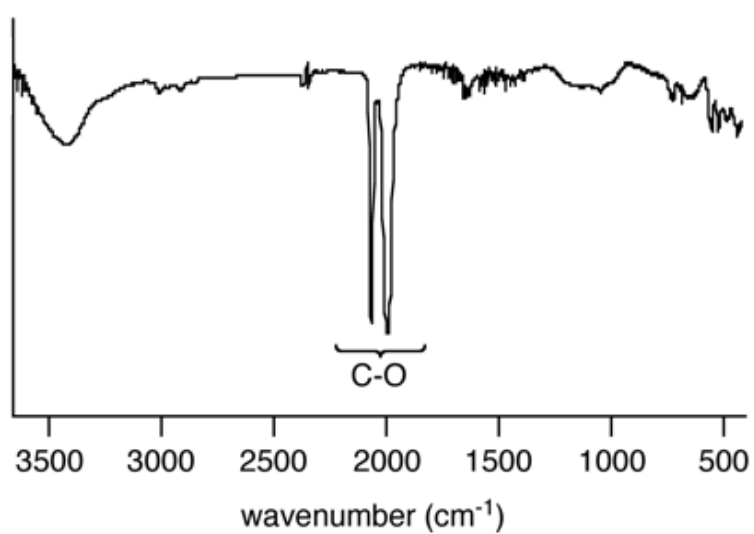

**Fig. S1** IR spectrum of **2** as a KBr disk.

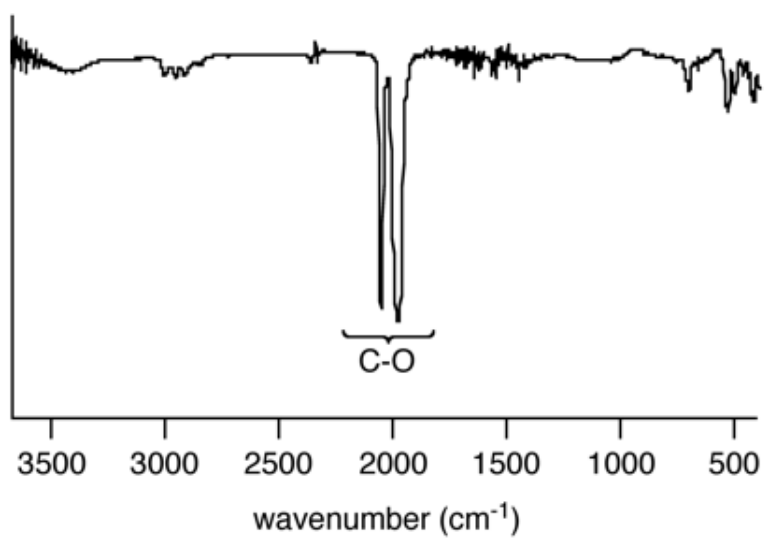

**Fig. S2** IR spectrum of **3** as a KBr disk.

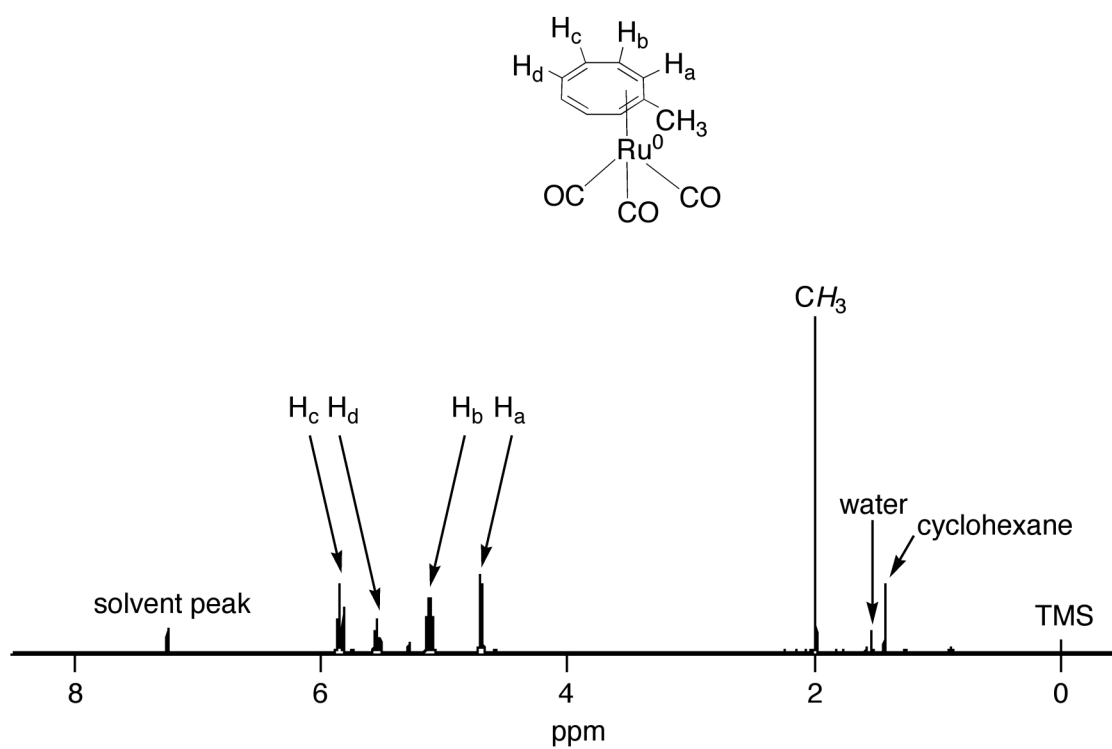

**Fig. S3**  $^1\text{H}$  NMR spectrum of **2** in  $\text{CDCl}_3$ .

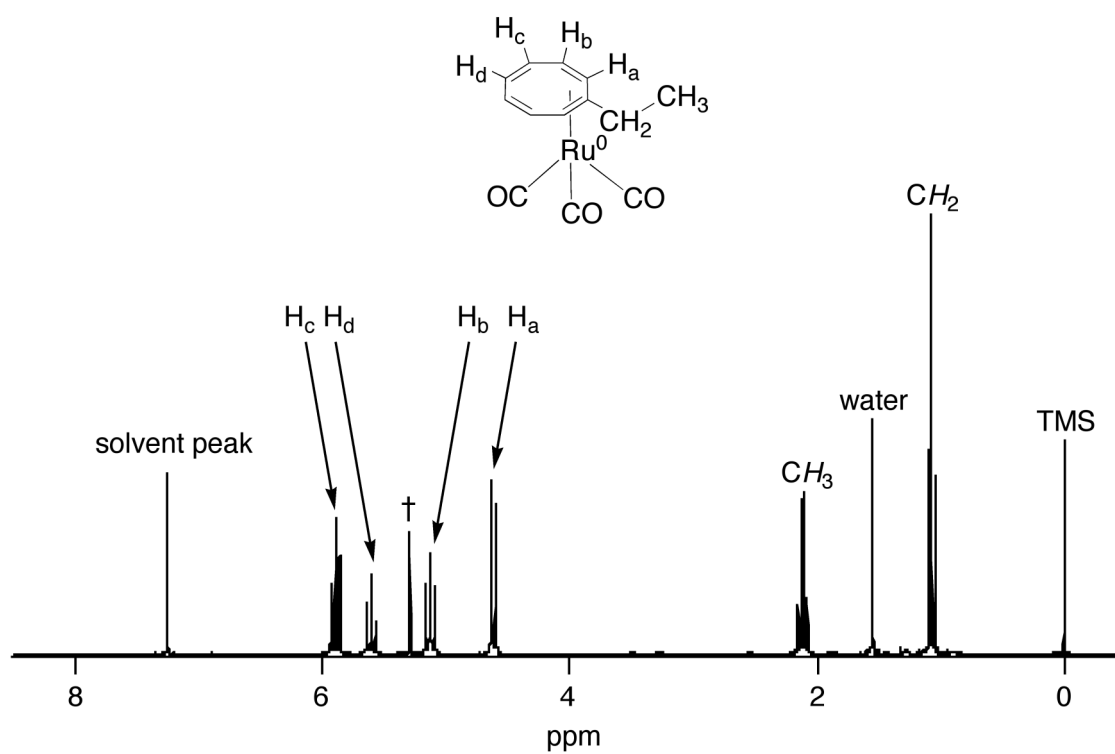

Fig. S4 <sup>1</sup>H NMR spectrum of **3** in CDCl<sub>3</sub>. †: Impurity, **1**.

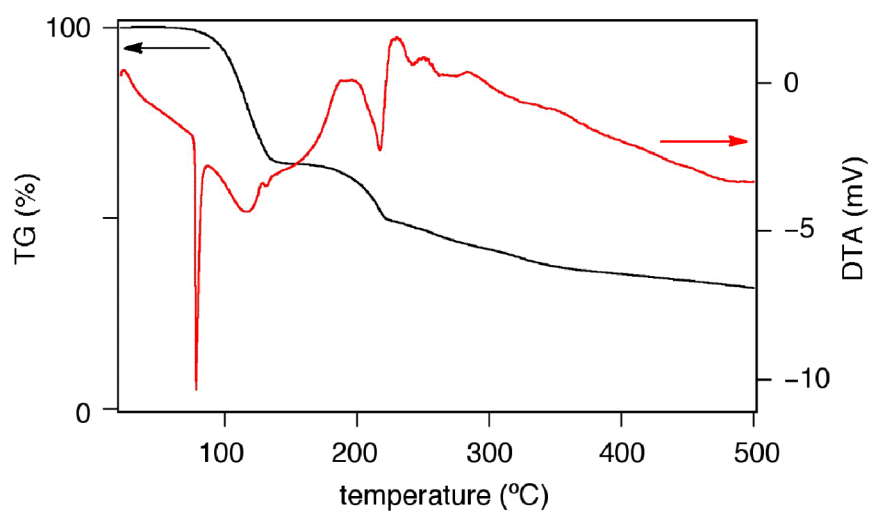

**Fig. S5** TG-DTA analysis of **1** (flow gas: N<sub>2</sub>, flow rate: 100 mL min<sup>-1</sup>, heating rate: 5 °C min<sup>-1</sup>).



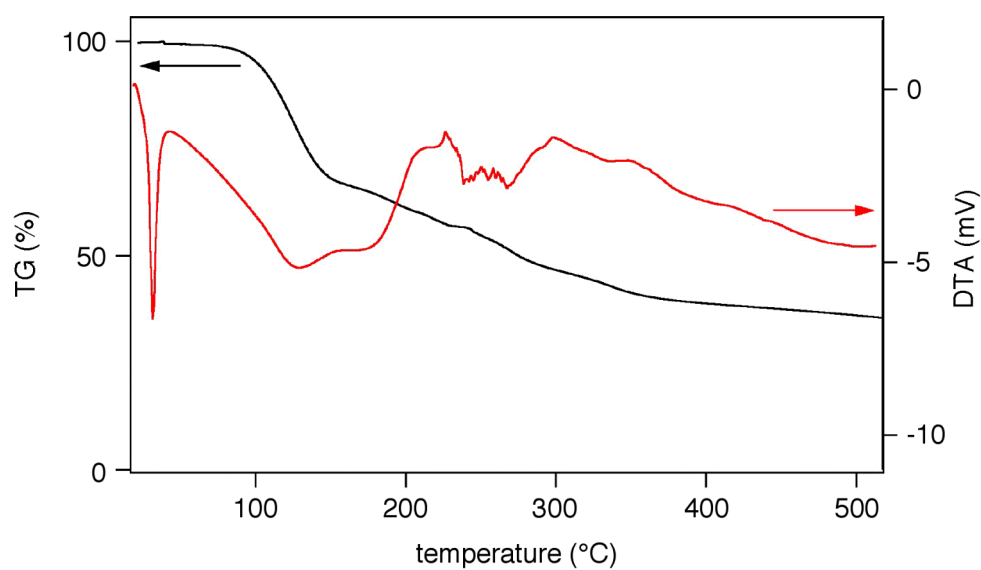

**Fig. S6** TG-DTA analysis of **2** (flow gas: N<sub>2</sub>, flow rate: 100 mL min<sup>-1</sup>, heating rate: 5 °C min<sup>-1</sup>).

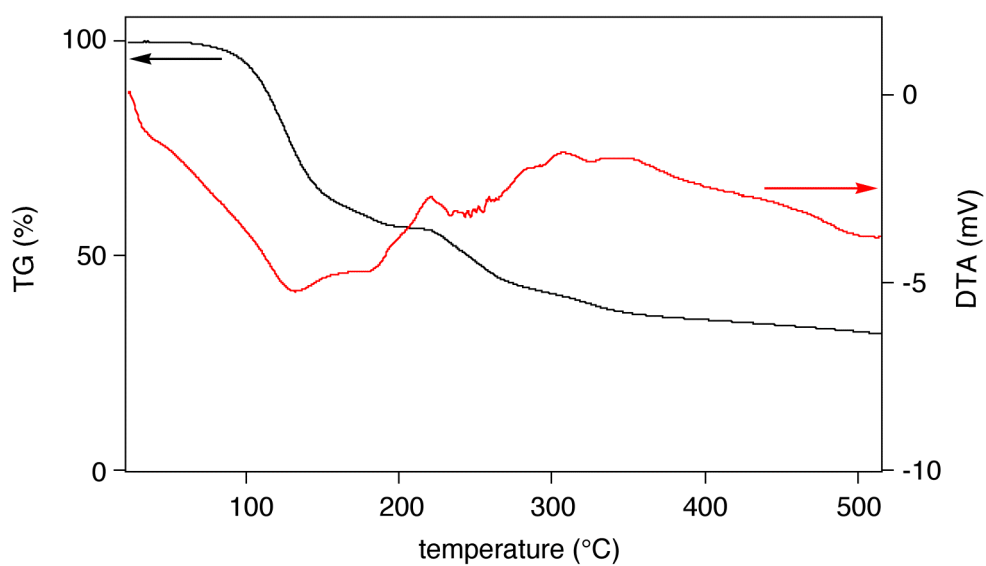

**Fig. S7** TG-DTA analysis of **3** (flow gas: N<sub>2</sub>, flow rate: 100 mL min<sup>-1</sup>, heating rate: 5 °C min<sup>-1</sup>).

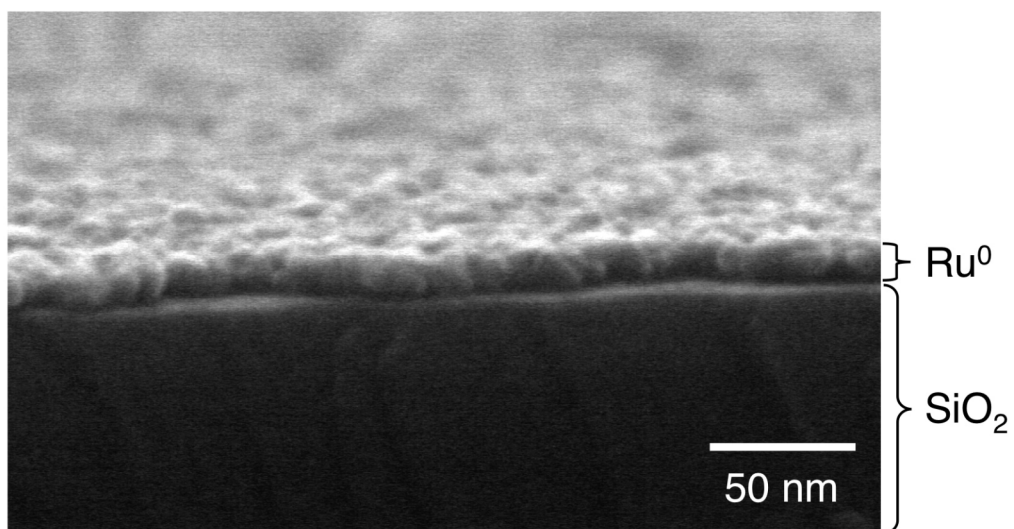

**Fig. S8** A SEM image of a Ru film deposited from **1** at 165 °C under a flow of N<sub>2</sub> (10 sccm) and H<sub>2</sub> (1 sccm).

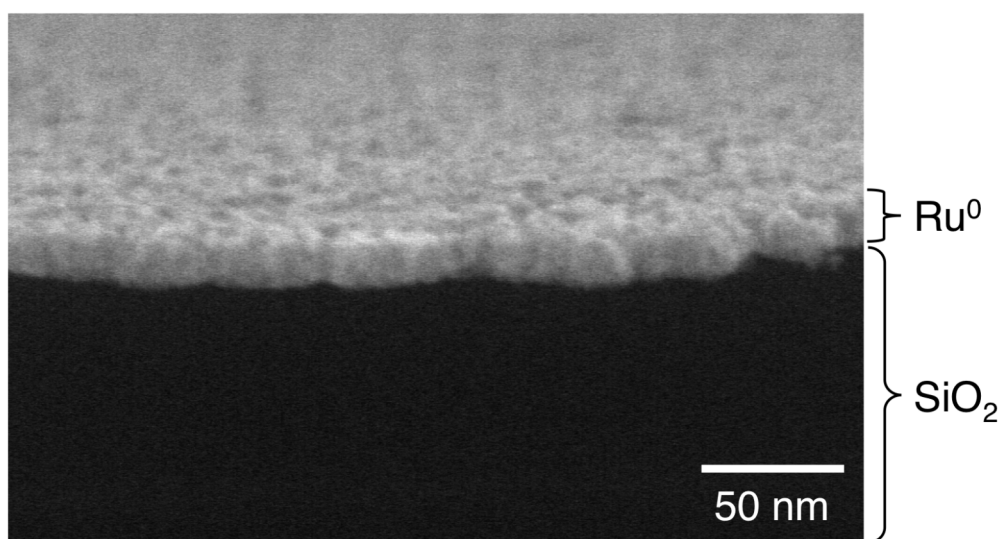

**Fig. S9** A SEM image of a Ru film deposited from **3** at 165 °C under a flow of N<sub>2</sub> (10 sccm) and H<sub>2</sub> (1 sccm).

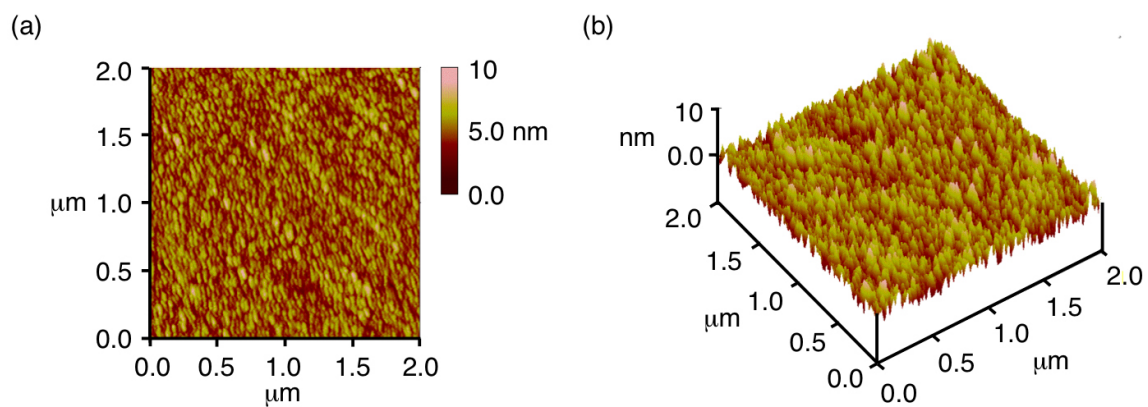

**Fig. S10** An AFM image of a 17 nm thick Ru film deposited from **1** at 165 °C under a flow of N<sub>2</sub> (10 sccm) and H<sub>2</sub> (1 sccm). (a) Two- and (b) three-dimensional views.

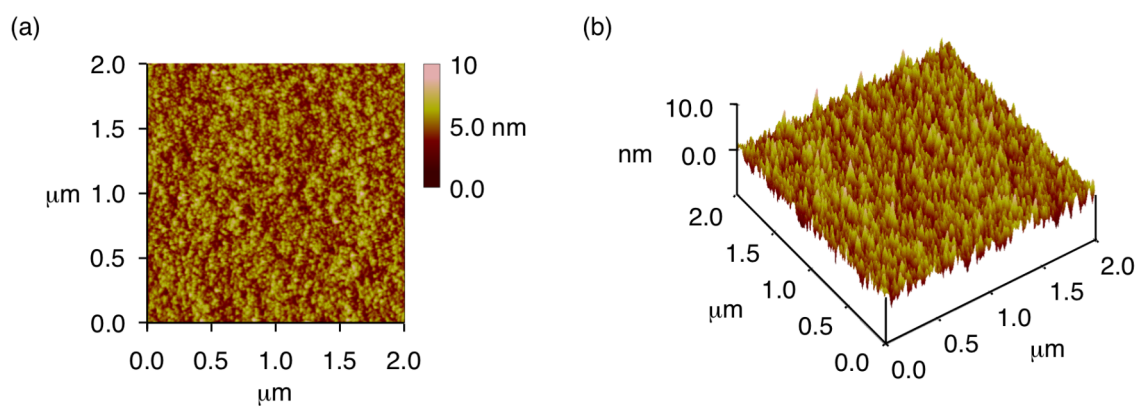

**Fig. S11** An AFM image of a 49 nm thick Ru film deposited from **3** at 175 °C under a flow of N<sub>2</sub> (10 sccm) and H<sub>2</sub> (1 sccm). (a) Two- and (b) three-dimensional views.

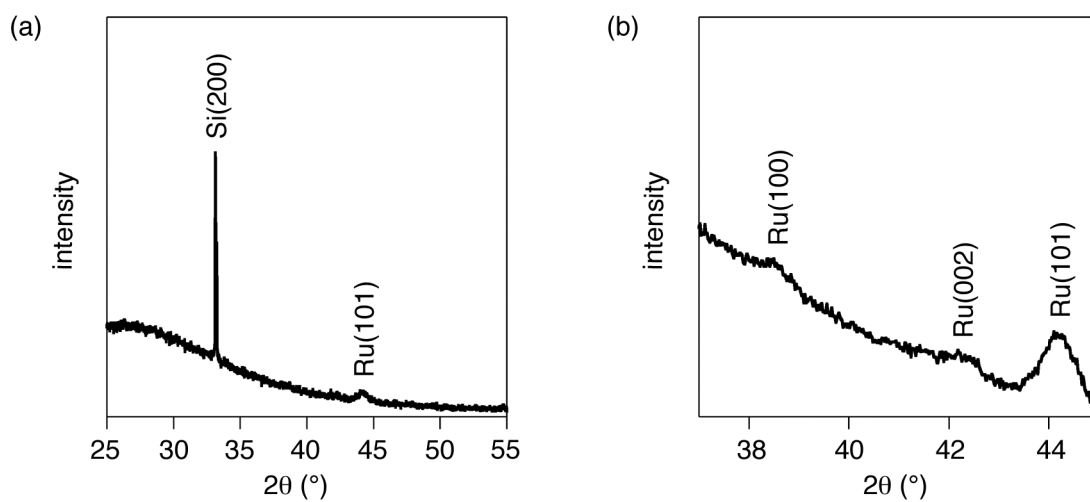

**Fig. S12** (a) An XRD pattern of Ru film deposited from **2** at 165 °C on SiO<sub>2</sub> substrates under a flow of N<sub>2</sub> (10 sccm) and H<sub>2</sub> (1 sccm). (b) Magnification of Ru(100), Ru(002) and Ru(101) peaks in (a).

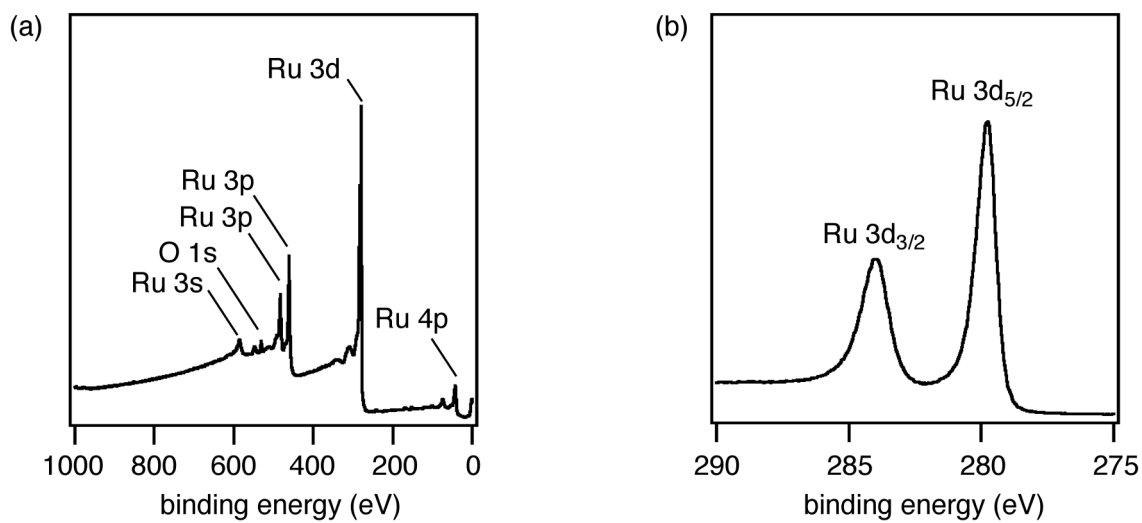

**Fig. S13** (a) An XPS spectrum of a Ru film deposited from **1** at 165 °C under a flow of N<sub>2</sub> (10 sccm) and H<sub>2</sub> (1 sccm). Peaks for O 1s and Si 2p originate from a SiO<sub>2</sub> substrate. (b) Magnification of Ru 3d<sub>3/2</sub> and 3d<sub>5/2</sub> peaks in (a).



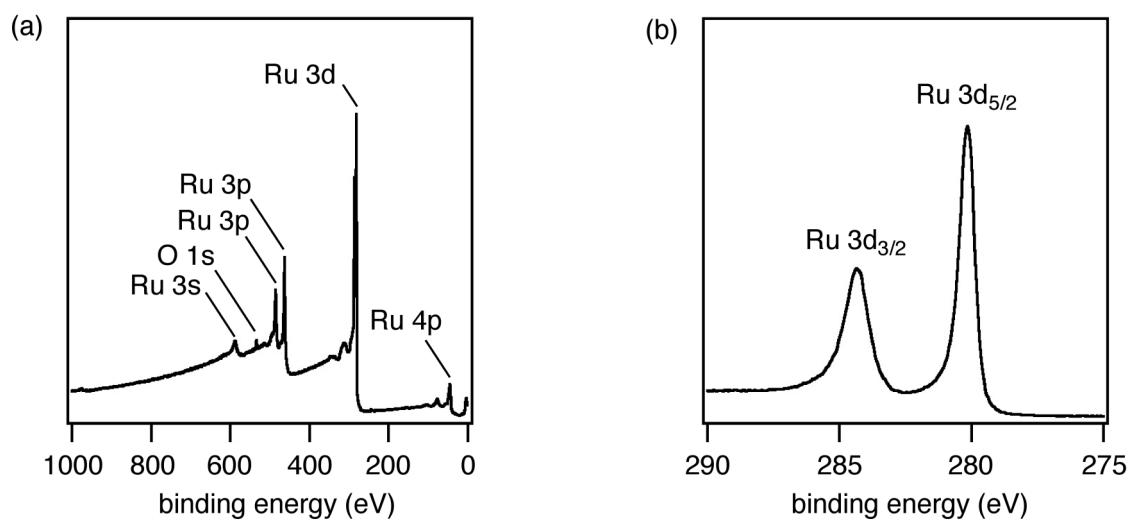

**Fig. S14** (a) An XPS spectrum of a Ru film deposited from **3** at 175 °C under a flow of N<sub>2</sub> (10 sccm) and H<sub>2</sub> (1 sccm). Peaks for O 1s and Si 2p originate from a SiO<sub>2</sub> substrate. (b) Magnification of Ru 3d<sub>3/2</sub> and 3d<sub>5/2</sub> peaks in (a).

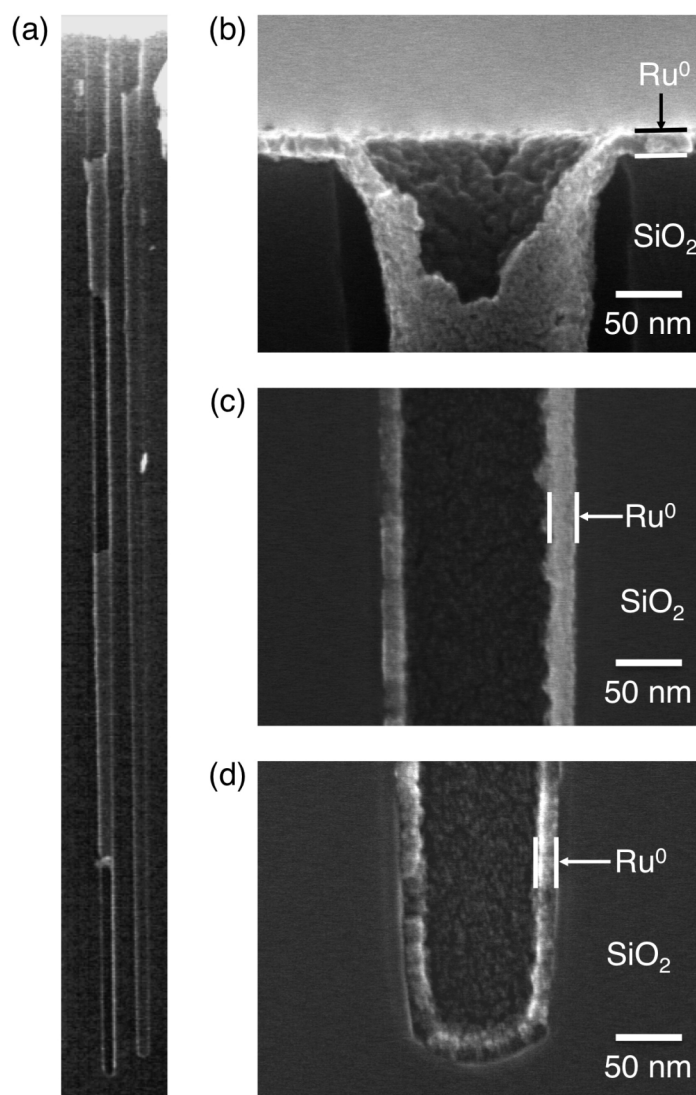

**Fig. S15** (a) A SEM image of holes with aspect ratios 40:1. A Ru film was deposited at 155 °C under a flow of N<sub>2</sub> (10 sccm) and H<sub>2</sub> (1 sccm) from complex **1**. Magnified images of (b) top, (c) middle and (d) bottom of the hole.

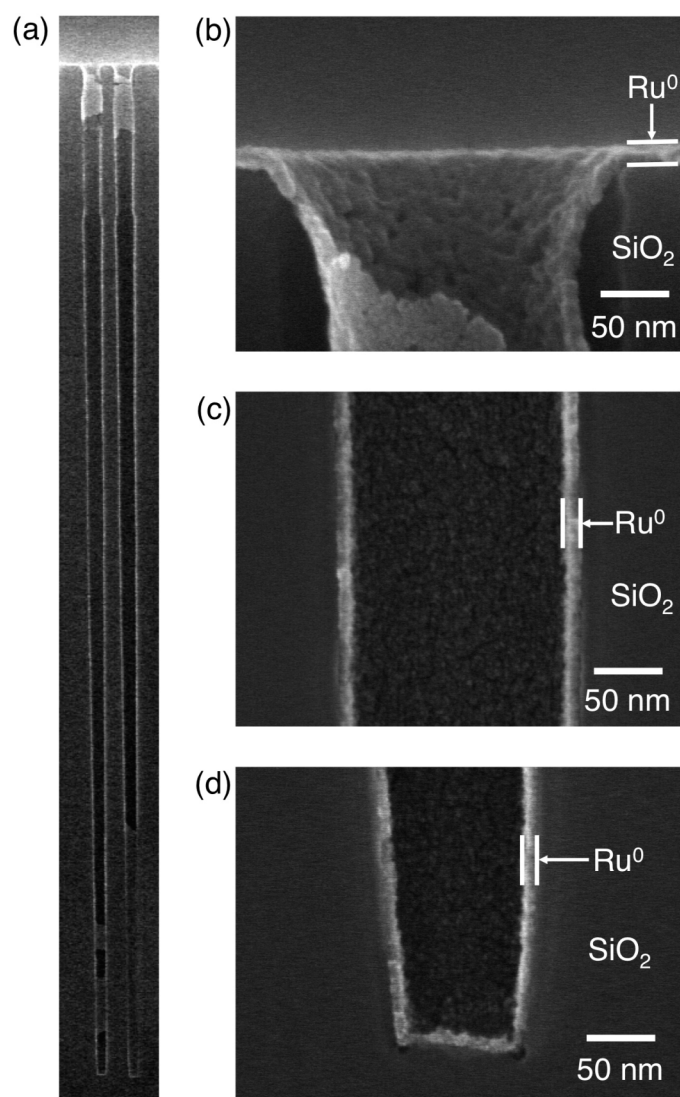

**Fig. S16** (a) A SEM image of holes with aspect ratios 40:1. A Ru film was deposited at 165 °C under a flow of N<sub>2</sub> (10 sccm) and H<sub>2</sub> (1 sccm) from complex **3**. Magnified images of (b) top, (c) middle and (d) bottom of the hole.
